# Supplementary material for: Multivalent stimulation of β1-, but not β2-receptors by adrenaline functionalised gold nanoparticles
Source: Royal Society of Chemistry journal article supplement (doi:10.1039/d2na00171c), 2022-01-01
Supplement: d2na00171c1.pdf [file d2na00171c1.pdf]

## Supporting Information

### **Multivalent stimulation of $\beta_1$ -, but not $\beta_2$ -receptors by adrenaline ligated to gold nanoparticles**

Annabelle Mattern,<sup>a</sup> Rebecca Claßen,<sup>b</sup> Annemarie Wolf,<sup>c</sup> Ervice Pouokam,<sup>b</sup> Klaus-Dieter  
Schlüter,<sup>c</sup> Mathias S. Wickleder<sup>a</sup> and Martin Diener<sup>b</sup>

a. Institute of Inorganic Chemistry, University of Cologne, Greinstrasse 6, 50939 Cologne.

b. Institute of Veterinary Physiology and Biochemistry, Justus Liebig University Giessen,  
Frankfurter Strasse 100, 35392 Giessen.

c. Institute of Physiology, Justus Liebig University Giessen, Aulweg 129, 35392 Giessen.

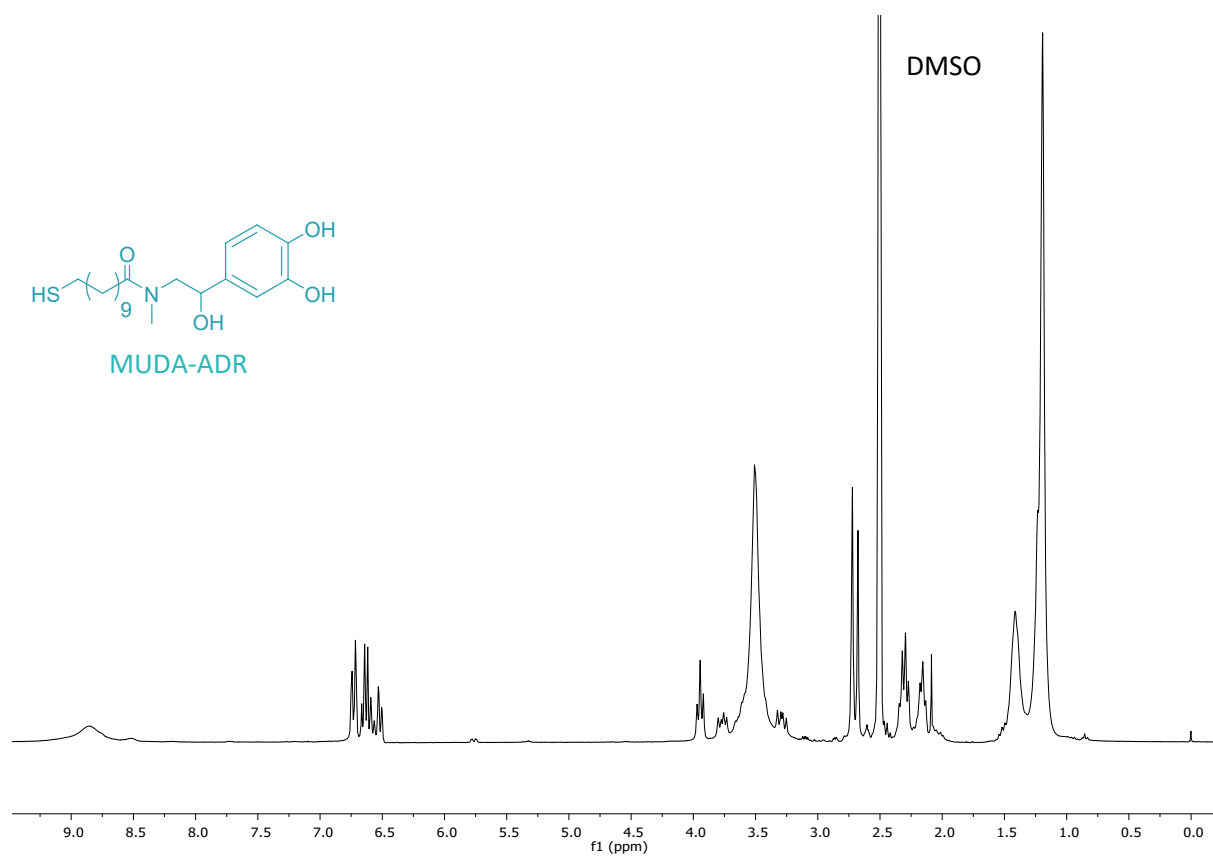

Figure 1:  $^1\text{H-NMR}$  (400 MHz) of the ligand MUDA-ADR, measured in  $\text{DMSO-d}_6$  (chemical shifts in ppm).

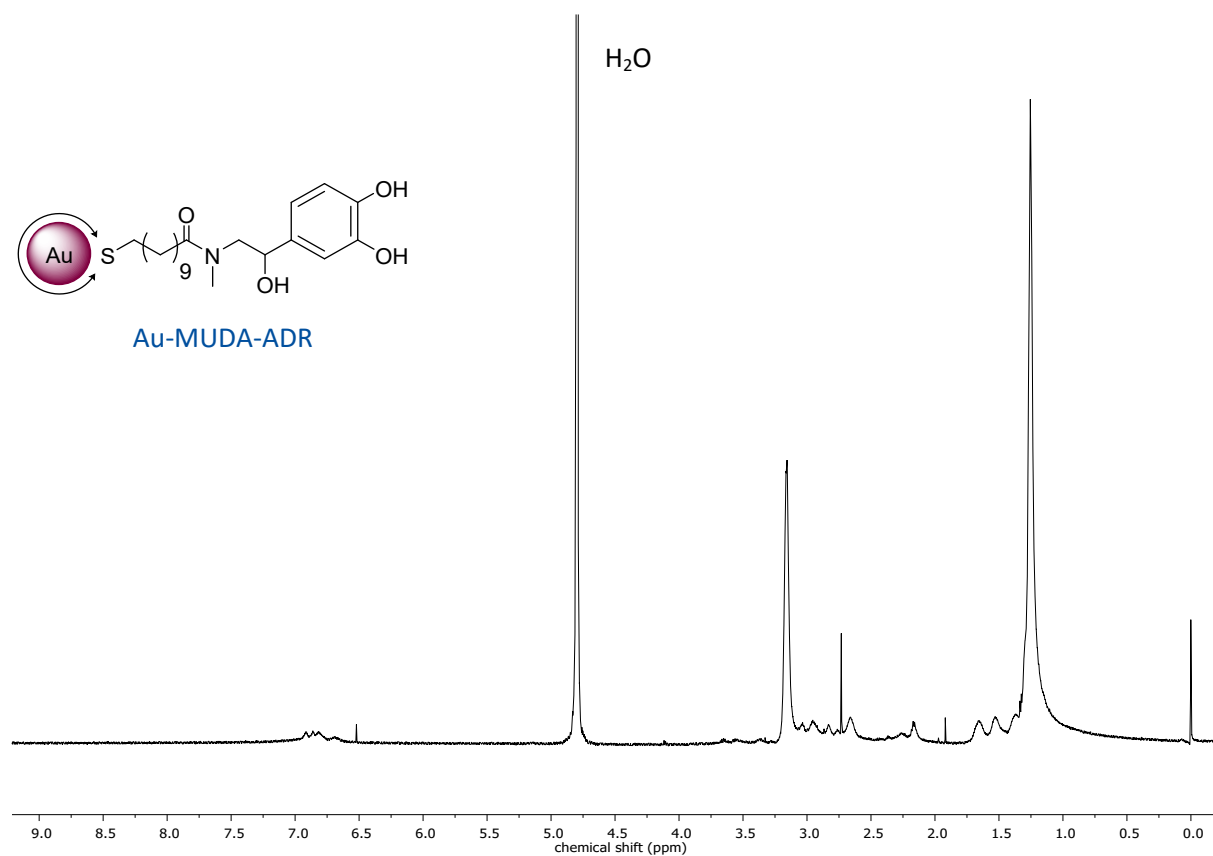

Figure 2:  $^1\text{H-NMR}$  (600 MHz) of Au-MUDA-ADR, measured in  $\text{D}_2\text{O}$  (chemical shifts in ppm).

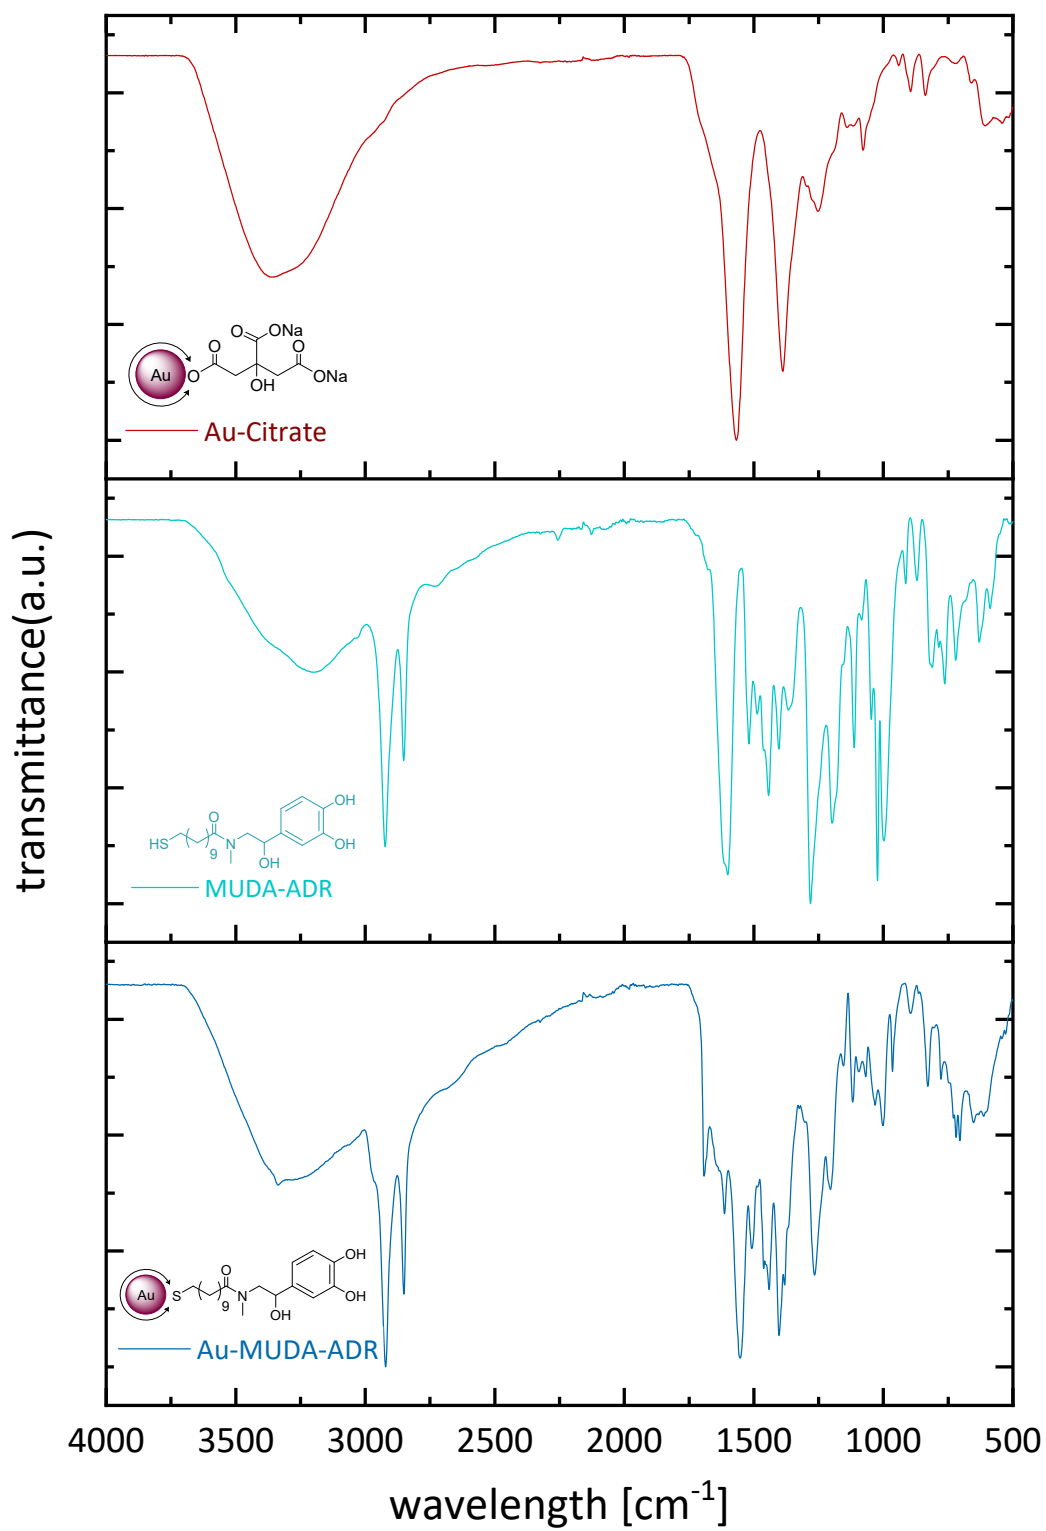

Figure 3: Normalised IR spectra of Au-Citrate NPs (above), the ligand MUDA-ADR (centre) and Au-MUDA-ADR NPs (below).

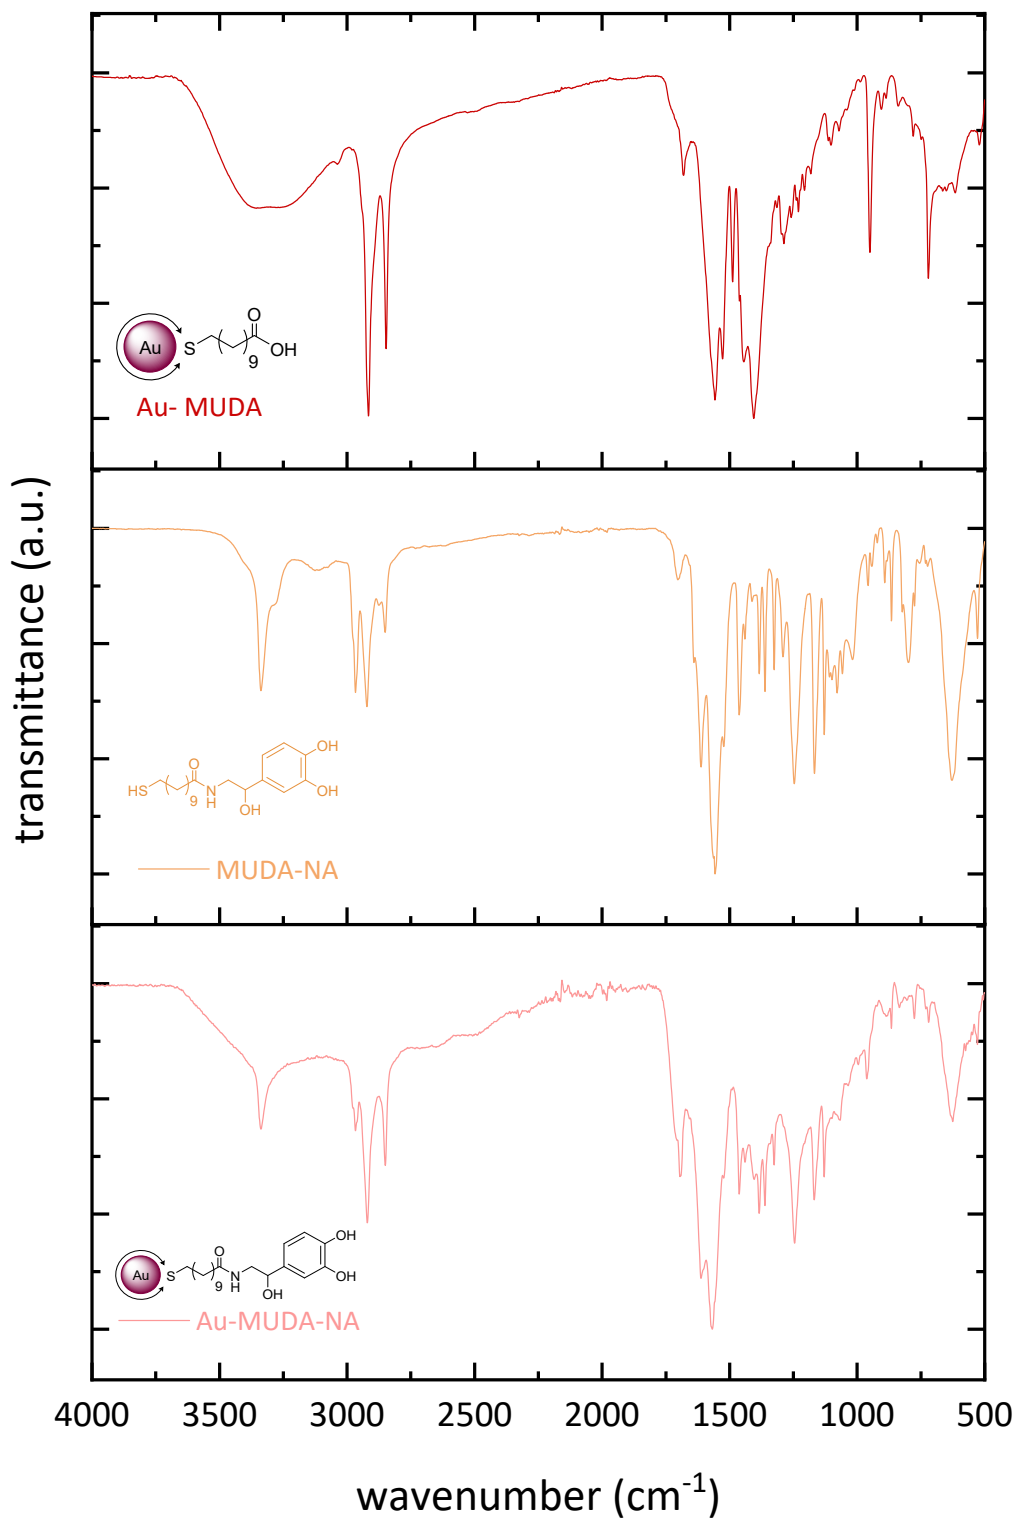

Figure 4: Normalised IR spectra of Au-MUDA NPs (above), the ligand MUDA-NA (centre) and Au-MUDA-NA NPs (below).
